# Supplementary material for: Plasma Proteome Fingerprints Reveal Distinctiveness and Clinical Outcome of SARS-CoV-2 Infection
Source: MDPI journal article supplement (doi:10.3390/v13122456), 2021-12-07
Supplement: s1 [file s1]

**Supplemental Table S1.**

|                     | Reference cohort  | Non-COVID-19      | Non-hospitalized<br>COVID-19 | Hospitalized<br>COVID-19 |         |              |                  |
|---------------------|-------------------|-------------------|------------------------------|--------------------------|---------|--------------|------------------|
|                     | (N = 20)          | (N = 44)          | (N = 44)                     | (N = 53)                 | p-value | p-value      | p-value          |
|                     | Group 1           | Group 2           | Group 3                      | Group 4                  | 1 vs. 2 | 2 vs. 3+4    | 3 vs. 4          |
| <b>Demographics</b> |                   |                   |                              |                          |         |              |                  |
| Age [years]         | 55.6 (44.9, 67.6) | 63.1 (50.1, 77.5) | 37.2 (27.7, 52.7)            | 71.2 (54.1, 79.2)        | 0.143   | <b>0.040</b> | <b>&lt;0.001</b> |
| Female              | 12 (60%)          | 23 (52%)          | 19 (43%)                     | 27 (51%)                 | 0.600   | 0.716        | 0.541            |
| <b>Comorbidity</b>  |                   |                   |                              |                          |         |              |                  |
| CKD                 | 1/19 (5%)         | 9 (20%)           | 3 (7%)                       | 11 (21%)                 | 0.258   | 0.461        | 0.080            |
| CHD                 | 1/19 (5%)         | 5 (11%)           | 4 (9%)                       | 11 (21%)                 | 0.658   | 0.610        | 0.160            |
| Hypertension        | 5/19 (26%)        | 18 (41%)          | 8 (18%)                      | 28 (53%)                 | 0.394   | 0.711        | <b>&lt;0.001</b> |
| T2DM                | 2/19 (11%)        | 3 (7%)            | 6 (14%)                      | 13 (25%)                 | 0.633   | 0.078        | 0.207            |
| COPD                | 0/19 (0%)         | 3 (7%)            | 0/43 (0%)                    | 6 (11%)                  | 0.547   | 1.000        | <b>0.031</b>     |
| Asthma              | 1/19 (5%)         | 1 (2%)            | 2 (5%)                       | 9 (17%)                  | 0.516   | 0.104        | 0.104            |
| MD                  | 1/19 (5%)         | 7/43 (16%)        | 1 (2%)                       | 1 (2%)                   | 0.416   | <b>0.004</b> | 1.000            |
| OAC                 | 1/19 (5%)         | 9/43 (21%)        | 0/43 (0%)                    | 10 (19%)                 | 0.155   | 0.112        | <b>0.002</b>     |
| <b>Treatment</b>    |                   |                   |                              |                          |         |              |                  |
| Length of stay      | 1.0 (1.0, 4.2)    | 3.0 (1.0, 9.0)    | 1.0 (1.0, 1.0)               | 12.0 (8.0, 20.0)         | 0.204   | 0.129        | <b>&lt;0.001</b> |

CKD = chronic kidney disease; CHD=coronary heart disease; T2DM=type 2 diabetes mellitus; COPD=chronic obstructive pulmonary disease; MD=malignant disease; OAC=oral anticoagulation.
