# Supplementary material for: Plasma Proteome Fingerprints Reveal Distinctiveness and Clinical Outcome of SARS-CoV-2 Infection
Source: MDPI journal article supplement (doi:10.3390/v13122456), 2021-12-07
Supplement: s1 [file s1]

|                           | Non-COVID-19<br>n=44 |        |                | Non-hospitalized COVID-19<br>n=44 |        |                | Hospitalized COVID-19<br>n=53 |        |                 | Non-<br>COVID-19<br>vs.<br>COVID-19 | Inpatient<br>vs.<br>Outpatient |
|---------------------------|----------------------|--------|----------------|-----------------------------------|--------|----------------|-------------------------------|--------|-----------------|-------------------------------------|--------------------------------|
|                           | n                    | median | IQR            | n                                 | median | IQR            | n                             | median | IQR             |                                     |                                |
| <b>Clinical Chemistry</b> |                      |        |                |                                   |        |                |                               |        |                 |                                     |                                |
| NA                        | 5                    | 139    | 132.00, 141.00 | 4                                 | 137    | 136.25, 137.50 | 10                            | 138    | 137.25, 139.75  | 1.000                               | 0.317                          |
| K                         | 5                    | 4.6    | 3.70, 36.00    | 4                                 | 4.35   | 4.05, 13.88    | 10                            | 4.6    | 4.15, 27.50     | 0.817                               | 0.831                          |
| CA                        | 1                    | 2.27   | 2.27, 2.27     | 3                                 | 2.26   | 2.23, 2.33     | 2                             | 2.38   | 2.34, 2.41      | 1.000                               | 0.400                          |
| CK                        | 26                   | 86.5   | 54.50, 123.50  | 14                                | 82.5   | 65.00, 159.75  | 27                            | 133    | 68.00, 218.50   | 0.080                               | 0.196                          |
| Creatinine                | 44                   | 0.92   | 0.79, 1.16     | 41                                | 0.84   | 0.68, 1.03     | 50                            | 1.02   | 0.83, 1.35      | 0.732                               | 0.005                          |
| eGFR                      | 44                   | 74.5   | 53.00, 91.00   | 39                                | 91     | 85.00, 91.00   | 49                            | 63     | 38.00, 84.00    | 0.594                               | <b>&lt;0.001</b>               |
| AST                       | 18                   | 28.5   | 21.50, 35.50   | 9                                 | 30     | 25.00, 42.00   | 25                            | 38     | 30.00, 57.00    | 0.023                               | 0.191                          |
| ALT                       | 29                   | 20     | 18.00, 26.00   | 31                                | 24     | 15.50, 43.00   | 41                            | 32     | 20.00, 49.00    | 0.010                               | 0.097                          |
| GGT                       | 28                   | 25     | 19.75, 70.50   | 27                                | 31     | 21.50, 78.50   | 38                            | 53     | 34.00, 98.75    | 0.076                               | 0.052                          |
| LDH                       | 23                   | 288    | 251.50, 392.50 | 26                                | 262    | 233.25, 323.50 | 29                            | 342    | 272.00, 518.00  | 0.504                               | <b>&lt;0.001</b>               |
| Bilirubin                 | 28                   | 0.37   | 0.29, 0.66     | 24                                | 0.32   | 0.25, 0.44     | 36                            | 0.52   | 0.31, 0.73      | 0.989                               | 0.025                          |
| TNT                       | 13                   | 4      | 3.00, 20.00    | 9                                 | 5      | 3.00, 9.00     | 12                            | 34     | 16.00, 111.00   | 0.218                               | <b>&lt;0.001</b>               |
| FERR                      | 0                    | NA     | NA             | 9                                 | 207.9  | 135.60, 627.00 | 7                             | 2305   | 444.65, 3220.45 | NA                                  | 0.114                          |
| CRP                       | 42                   | 9.9    | 1.57, 64.90    | 43                                | 11.2   | 4.80, 30.60    | 49                            | 46.2   | 16.20, 120.80   | 0.175                               | <b>&lt;0.001</b>               |
| PCT                       | 27                   | 0.08   | 0.04, 0.15     | 22                                | 0.05   | 0.04, 0.10     | 32                            | 0.11   | 0.08, 0.25      | 0.345                               | <b>&lt;0.001</b>               |
| <b>Coagulation</b>        |                      |        |                |                                   |        |                |                               |        |                 |                                     |                                |
| INR                       | 38                   | 1.08   | 1.00, 1.18     | 35                                | 1.05   | 1.00, 1.10     | 49                            | 1.09   | 1.02, 1.27      | 0.916                               | 0.060                          |
| aPTT                      | 38                   | 34     | 31.13, 36.30   | 35                                | 35.2   | 33.10, 37.75   | 49                            | 34.5   | 32.90, 38.30    | 0.176                               | 0.713                          |
| <b>Hemostaseology</b>     |                      |        |                |                                   |        |                |                               |        |                 |                                     |                                |
| WBC                       | 43                   | 9.33   | 7.56, 11.68    | 44                                | 5.62   | 4.15, 6.59     | 53                            | 6.68   | 5.27, 9.36      | <b>&lt;0.001</b>                    | 0.016                          |
| Hb                        | 43                   | 13     | 11.60, 14.00   | 44                                | 13.25  | 12.10, 14.33   | 53                            | 13.4   | 11.60, 14.10    | 0.629                               | 0.882                          |
| HCT                       | 43                   | 0.38   | 0.35, 0.41     | 44                                | 0.39   | 0.35, 0.42     | 53                            | 0.39   | 0.34, 0.42      | 0.948                               | 0.714                          |
| RBC                       | 43                   | 4.5    | 4.00, 4.80     | 44                                | 4.75   | 4.38, 5.10     | 53                            | 4.5    | 4.00, 5.10      | 0.250                               | 0.157                          |
| MCV                       | 43                   | 86     | 83.00, 90.00   | 44                                | 83     | 79.75, 85.25   | 53                            | 86     | 81.00, 89.00    | 0.048                               | 0.006                          |
| MCH                       | 43                   | 29.2   | 28.30, 31.00   | 44                                | 28.5   | 26.98, 29.52   | 53                            | 29.3   | 28.40, 30.70    | 0.167                               | 0.008                          |
| MCHC                      | 43                   | 34     | 33.30, 34.90   | 44                                | 34     | 33.27, 34.73   | 53                            | 34.1   | 33.30, 35.00    | 0.578                               | 0.609                          |
| RDW                       | 42                   | 13.9   | 12.53, 15.30   | 44                                | 12.8   | 12.47, 13.53   | 53                            | 13.4   | 12.90, 14.70    | 0.156                               | 0.007                          |
| PLT                       | 43                   | 263    | 210.50, 318.50 | 44                                | 206    | 172.75, 242.25 | 53                            | 227    | 180.00, 271.00  | 0.001                               | 0.120                          |
| MPV                       | 42                   | 10.15  | 9.53, 10.70    | 43                                | 10.3   | 9.95, 11.10    | 52                            | 10.3   | 9.80, 11.00     | 0.108                               | 0.742                          |

**Supplemental Table S2**

Diagnostics were performed at presentation to the ED as standard of care. Abbreviations: white blood cells (WBC), hemoglobin (HB), hematocrit (HCT) red blood cells (RBC), mean corpuscular volume (MCV), mean corpuscular hemoglobin (MCH), mean corpuscular hemoglobin concentration (MCHC), red distribution width (RDW), platelets (PLT), mean platelet volume (MPV), sodium (NA), potassium (K), Calcium (CA), creatine kinase (CK), calculated estimated glomerular filtration rate (eGFR), aspartate aminotransferase (AST), alanine aminotransferase (ALT), gamma-glutamyltransferase (GGT), lactate dehydrogenase (LDH), total bilirubin, troponin T (TNT), C-reactive protein (CRP), procalcitonin (PCT), activated partial thromboplastin time (aPTT, coagulometry), prothrombin time/international normalized ratio (INR, coagulometry).
