# Supplementary figures and images for: Plasma Proteome Fingerprints Reveal Distinctiveness and Clinical Outcome of SARS-CoV-2 Infection
Source: MDPI journal article supplement (doi:10.3390/v13122456), 2021-12-07

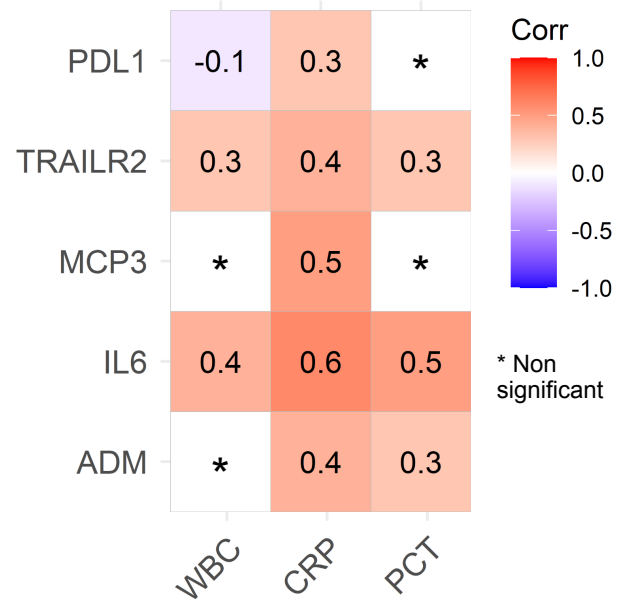

**Supplemental Figure S1**

Supplement: s1 [file s1]
